# Supplementary material for: Sr/Ba substitution induced higher thermal stability far red-emitting Ba1−ySryLaLiWO6:Mn4+ phosphors for plant growth applications
Source: Royal Society of Chemistry journal article supplement (doi:10.1039/d2dt03466b), 2022-12-14
Supplement: d2dt03466b1.pdf [file d2dt03466b1.pdf]

## Supporting information

### Sr/Ba Substitute -Induced Higher Thermal Stability far Red-Emitting

### Ba<sub>1-y</sub>Sr<sub>y</sub>LaLiWO<sub>6</sub>:Mn<sup>4+</sup> Phosphor for Plant Growth Applications

Hao Jin<sup>1</sup>, Nian Fu<sup>1,2\*</sup>, Chunhao Wang<sup>1</sup>, Chunxiao Qi<sup>1</sup>, Zhenyang Liu<sup>1</sup>, Dawei Wang<sup>3</sup>, Li Guan<sup>2</sup>, Fenghe Wang<sup>1,2\*</sup>, Xu Li<sup>1\*</sup>

<sup>1</sup> Hebei Key Laboratory of Photo-Electricity Information and Materials, College of Physics Science and Technology, Hebei University, Baoding 071002, PR China

<sup>2</sup> Key Laboratory of High-precision Computation and Application of Quantum Field Theory of Hebei Province, Hebei University, Baoding 071002, PR China

<sup>3</sup> Hebei Key Laboratory of Semiconductor Lighting and Display Critical Materials, Hebei Ledphor optoelectronics technology Co., LTD. Baoding, 071000, PR China

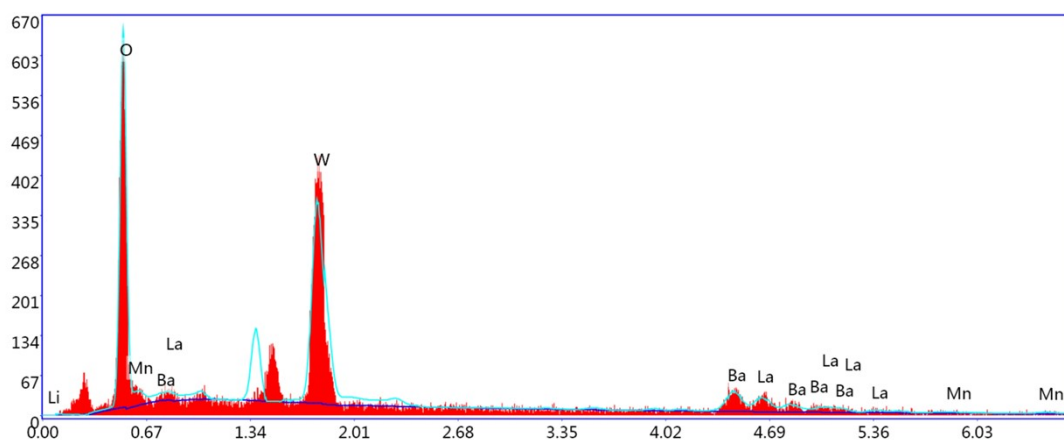

Fig. S1 Show the EDX composition analysis of the sample.

Table S1 The Rietveld refinement result of BLLW:1.2%Mn<sup>4+</sup> phosphor.

| compound                        | x = 0    | x = 1.2% |
|---------------------------------|----------|----------|
| Sp.gr                           | F m -3 m | F m -3 m |
| $a=b=c(\text{\AA})$             | 8.0975   | 8.0975   |
| $\alpha=\beta=\gamma(^{\circ})$ | 90       | 90       |
| $V(\text{\AA}^3)$               | 519.24   | 514.555  |
| W-O bond length                 | 1.9231   | 1.9234   |
| $R_{wp}(\%)$                    |          | 8.93     |
| $R_p(\%)$                       |          | 6.37     |
| $R_B(\%)$                       |          | 8.75     |

\* Corresponding author: [funian3678@163.com](mailto:funian3678@163.com) (N. Fu); [fenghe\\_wang@hotmail.com](mailto:fenghe_wang@hotmail.com) (F. H. Wang); [lixcn@sina.com](mailto:lixcn@sina.com) (X. Li)

**Table. S2** The crystal field strength parameters of BLLW:1.2%Mn<sup>4+</sup>.

| Sample                              | BLLW:1.2%Mn <sup>4+</sup>                    |
|-------------------------------------|----------------------------------------------|
| ${}^4A_{2g} \rightarrow {}^4T_{1g}$ | 28819 cm <sup>-1</sup>                       |
| ${}^4A_{2g} \rightarrow {}^4T_{2g}$ | 21053 cm <sup>-1</sup>                       |
| ${}^2E_g \rightarrow {}^4A_{2g}$    | 13947 cm <sup>-1</sup>                       |
| $Dq/B$                              | 2.78                                         |
| $B,C$                               | 757 cm <sup>-1</sup> , 2773 cm <sup>-1</sup> |
| $\theta_1$                          | 0.92                                         |

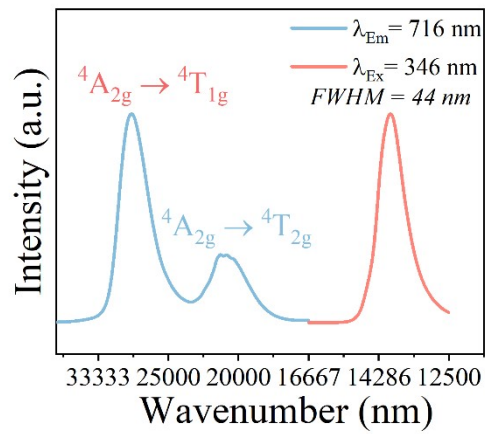

**Fig. S2** The PLE and PL spectra with wavenumber of BLLW:1.2%Mn<sup>4+</sup> phosphors

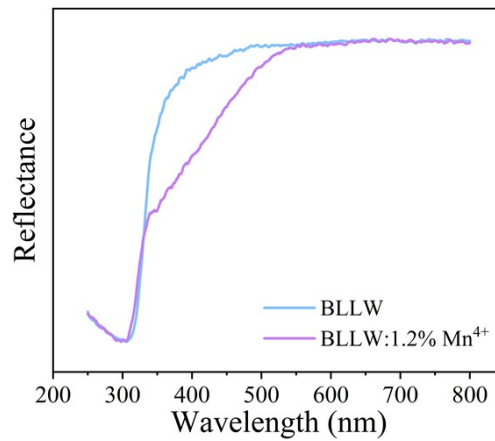

**Fig. S3** Diffuse reflection spectrum of BLLW:Mn<sup>4+</sup> and BLLW.

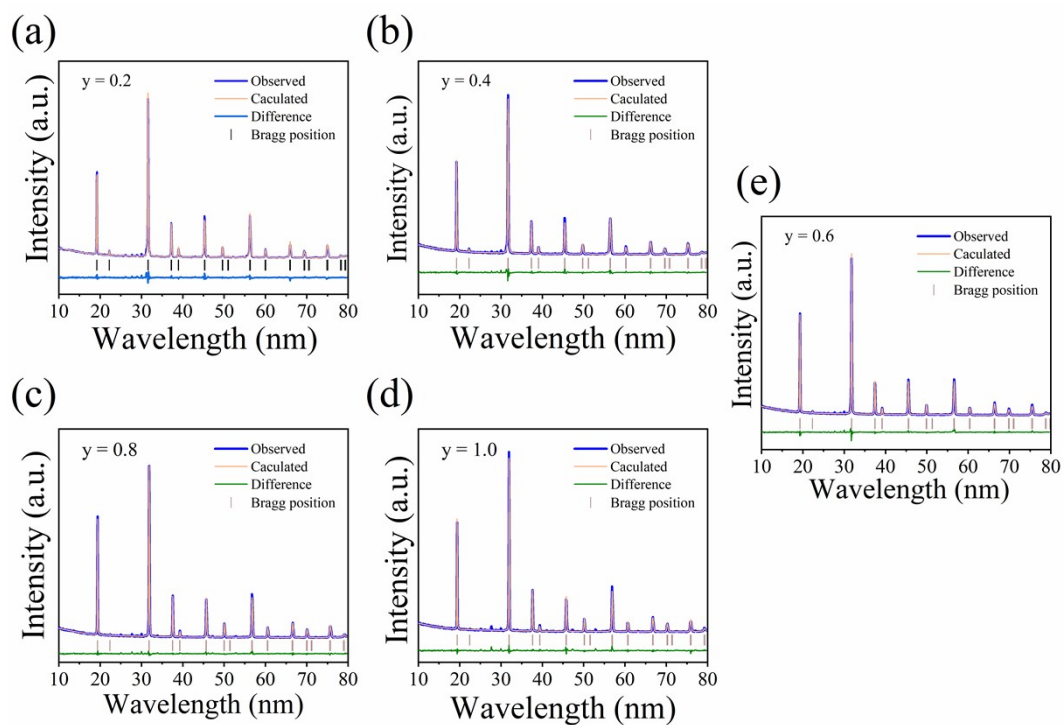

**Fig. S4** Rietveld refinements of XRD profiles: (a)~(e) $\text{Ba}_{1-y}\text{Sr}_y\text{LaLiWO}_6:\text{Mn}^{4+}$

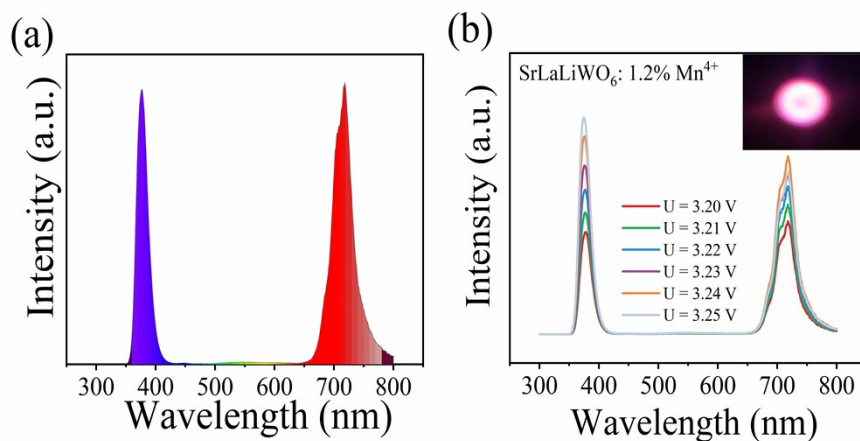

**Fig. S5** (a) Electroluminescence spectra of  $\text{SrLaLiWO}_6:\text{Mn}^{4+}$  coated a 365 nm NUV chip. (b) Spectra of  $\text{SrLaLiWO}_6:\text{Mn}^{4+}$  phosphors coated with a 365 nm NUV chip at different voltages.
